# Supplementary material
Source: publisher figshare collection journal article supplement (https://sage.figshare.com/ndownloader/files/31643208)
Supplement: Supplementary file 1 [file 31643208]

Appendix table 1. Searching strategy in each database

| Database | No (#) | Keywords | Number of references |
| --- | --- | --- | --- |
| Pubmed | 1 | "stroke"[Title/Abstract] OR "strokes"[Title/Abstract] OR "cerebrovascular accident"[Title/Abstract] OR "cerebrovascular accidents"[Title/Abstract] OR "cva"[Title/Abstract] OR "cvas"[Title/Abstract] OR "cerebrovascular stroke"[Title/Abstract] OR "cerebrovascular strokes"[Title/Abstract] OR "brain vascular accident"[Title/Abstract] OR "brain vascular accidents"[Title/Abstract] OR "vascular accident brain"[Title/Abstract] | 281669 |
| 2 | "proprioceptive training"[All Fields] OR “proprioceptive training"[Title/Abstract] OR "proprioceptive training group"[Title/Abstract] OR "proprioceptive training program"[Title/Abstract] OR "proprioceptive training programme"[Title/Abstract] OR "proprioceptive training programs"[Title/Abstract] | 238 |
| 3 | "sensorimotor training"[Title/Abstract] OR "sensorimotor training program"[Title/Abstract] OR "sensorimotor training programme"[Title/Abstract] OR "sensorimotor treatment"[Title/Abstract] OR "sensorimotor feedback"[Title/Abstract] OR "sensorimotor feedbacks"[Title/Abstract] OR "proprioceptive feedback"[Title/Abstract] OR "proprioceptive feedbacks"[Title/Abstract] | 1073 |
| 4 | "neuromuscular training"[Title/Abstract] OR "neuromuscular training exercise"[Title/Abstract] OR "neuromuscular training intervention"[Title/Abstract] OR "neuromuscular training program"[Title/Abstract] OR "neuromuscular facilitation"[Title/Abstract] OR "proprioceptive neuromuscular facilitation"[Title/Abstract] OR "proprioceptive neuromuscular facilitation pnf"[Title/Abstract] | 944 |
| 5 | "balance training"[Title/Abstract] OR "balance training program"[Title/Abstract] OR "balance training exercises"[Title/Abstract] OR "balance training intervention"[Title/Abstract] OR "proprioceptive balance"[Title/Abstract] OR "proprioceptive balance training"[Title/Abstract] OR "proprioceptive based"[Title/Abstract] | 1593 |
| 6 | #1 AND #2 | 18 |
| 7 | #1 AND #3 | 73 |
| 8 | #1 AND #4 | 68 |
| 9 | #1 AND #5 | 179 |
| 10 | #6 OR #7 OR #8 OR #9 | 336 |
| 11 | Filter: Clinical Trial, Randomized Controlled Trial, Humans, English | **88** |
| Science direct |  | "stroke" OR "cerebrovascular accident" AND "proprioceptive training" OR "sensorimotor training" OR "neuromuscular training" OR "proprioceptive neuromuscular facilitation" OR "balance training" OR "proprioceptive balance" OR "proprioceptive based intervention"  Limit to research articles | **207** |
| Cochrane | 1 | “stroke” OR “cerebrovascular accident” [mesh] | 75125 |
| 2 | “proprioceptive training” OR “proprioceptive intervention” OR “proprioceptive exercise” OR “proprioceptive based” | 172 |
| 3 | “sensorimotor training” OR “sensorimotor exercise” OR “sensorimotor intervention” OR “sensorimotor feedback” | 264 |
| 4 | “neuromuscular training” OR “neuromuscular intervention” OR “neuromuscular exercise” OR “proprioceptive neuromuscular facilitation” | 741 |
| 5 | “balance training” OR “proprioceptive balance” OR “proprioceptive balance training” | 1661 |
| 6 | #1 AND #2 | 8 |
| 7 | #1 AND #3 | 39 |
| 8 | #1 AND #4 | 75 |
| 9 | #1 AND #5 | 307 |
| 10 | #6 OR #7 OR #8 OR #9 | 419 |
| 11 | Clinical trial | **373** |
| Embase | 1 | ‘cerebrovascular accident’:ab,ti OR ‘stroke$’:ab,ti OR ‘cerebrovascular accident*’:ab,ti | 436713 |
| 2 | ‘proprioception’:ab,ti OR ‘proprioceptive training*’:ab,ti OR ‘proprioceptive intervention*’:ab,ti OR ‘proprioceptive program*’:ab,ti OR ‘proprioceptive exercise*’:ab,ti OR ‘proprioceptive feedback’:ab,ti | 7420 |
| 3 | ‘sensorimotor function’:ab,ti OR ‘sensorimotor training*’:ab,ti OR ‘sensorimotor treatment*’:ab,ti OR ‘sensorimotor intervention*’:ab,ti OR ‘sensorimotor feedback*’:ab,ti OR ‘sensory feedback’:ab,ti | 4690 |
| 4 | ‘neuromuscular training’:ab,ti OR ‘neuromuscular training*’:ab,ti OR ‘neuromuscular exercise*’:ab,ti OR neuromuscular intervention*’:ab,ti OR neuromuscular program*’:ab,ti OR ‘neuromuscular facilitation’:ab,ti OR ‘proprioceptive neuromuscular facilitation’:ab,ti | 1241 |
| 5 | ‘balance training system’:ab,ti OR ‘balance training*’:ab,ti OR ‘balance exercise*’:ab,ti OR ‘balance intervention*’:ab,ti OR ‘proprioceptive balance’:ab,ti OR ‘proprioceptive based’:ab,ti | 3106 |
| 6 | #1 AND #2 | 390 |
| 7 | #1 AND #3 | 515 |
| 8 | #1 AND #5 | 88 |
| 9 | #1 AND #2 | 303 |
| 10 | #6 OR #7 OR #8 OR #9 | 1259 |
| 11 | #10 AND 9[controlled clinical trial]/lim OR [randomized controlled trial]/lim) AND [human]/lim AND [English]/lim | **201** |
| Medline | 1 | (stroke or cerebrovascular accident).mp.  Limit to (Englis language and human) | 282922 |
| 2 | (proprioceptive training or proprioceptive intervention or proprioceptive exercise).mp.  Limit to (Englis language and human) | 184 |
| 3 | (sensorimotor training or sensorimotor exercise or sensorimotor intervention or proprioceptive feedback).mp.  Limit to (Englis language and human) | 633 |
| 4 | (neuromuscular training or neuromuscular facilitation or proprioceptive neuromuscular facilitation).mp.  Limit to (Englis language and human) | 617 |
| 5 | (balance training or balance exercise or proprioceptive balance).mp.  Limit to (Englis language and human) | 1347 |
| 6 | #1 AND #2 | 14 |
| 7 | #1 AND #3 | 59 |
| 8 | #1 AND #4 | 32 |
| 9 | #1 AND #5 | 139 |
| 10 | #6 OR #7 OR #8 OR #9 | **241** |
